# Supplementary material for: The genomic landscape of undifferentiated embryonal sarcoma of the liver is typified by C19MC structural rearrangement and overexpression combined with TP53 mutation or loss
Source: PLoS Genet. 2020 Apr 20;16(4):e1008642. doi: 10.1371/journal.pgen.1008642 (PMC7192511; doi:10.1371/journal.pgen.1008642)
Supplement: S2 Table — (XLSX) [file pgen.1008642.s004.xlsx]

## Sheet: Sheet1
S2 Table: Putatively oncogenic somatic mutations in matched tumor-normal sequencing cohort
Gene	Chromosome	Start_position	End_position	Variant_Classification	Reference_Allele	Tumor_Seq_Allele1	Tumor_Seq_Allele2	Sample	Protein_Change
ANKRD12	18	9263810	9263810	Nonsense_Mutation	C	C	A	PARCGJ	p.S1873X
BCL3	19	45262816	45262816	Missense_Mutation	G	G	A	PAUPRI	p.V437I
JAK3	19	17948796	17948796	Missense_Mutation	C	C	T	PAVZCN	p.R549Q
JAKMIP1	4	6086694	6086694	Splice_Site	T	T	A	PATWFW	inronic splice site
MMP13	11	102826030	102826043	Frame_Shift_Del	TGTATTCACCCACA	TGTATTCACCCACA	-	PAUPRI	p.DVGEYN100fs
PTPN11	12	112924409	112924409	Missense_Mutation	C	C	T	PATWFW	p.A452V
SDK1	7	4260996	4260996	Splice_Site	G	G	T	PATWFW	p.D1943Y
SFMBT2	10	7239509	7239509	Splice_Site	C	C	G	PAUPDM	intronic splice site
SIM1	6	100911250	100911250	Frame_Shift_Del	G	G	-	PAVZCN	p.A32fs
SIRT1	10	69666633	69666633	Nonsense_Mutation	T	T	G	PAUPDM	p.Y343*
TOP3A	17	18186128	18186128	Frame_Shift_Del	A	A	-	PAUPDM	p.F635fs
TP53	17	7577539	7577539	Missense_Mutation	G	G	A	PATWFW	p.R248W
TP53	17	7574003	7574003	Nonsense_Mutation	G	G	A	PAUPRI	p.R342*
TP53	17	7578522	7578522	Silent	T	T	C	PAWSCY	p.Q136Q
TP53	17	7578462	7578467	In_Frame_Del	GCGGGT	GCGGGT	-	PAWSXX	p.TR155del
TP53	17	7577120	7577120	Missense_Mutation	C	C	T	PARCGJ	p.R273H
TSC2	16	2121876	2121876	Frame_Shift_Ins	-	-	GGCT	PARCGJ	p.R680fs
WAC	10	28824560	28824560	Nonsense_Mutation	G	G	T	PAUPRI	p.G50*
ZNF132	19	58944815	58944815	Nonsense_Mutation	C	C	A	PARCGJ	p.E666X
